# Supplementary material
Source: publisher figshare collection journal article supplement (https://sage.figshare.com/ndownloader/files/16261409)
Supplement: Supplementary file 1 [file 16261409]

**Supplemental material**  
**for ‘Evaluating electoral management body capacity’**  
**by Holly Ann Garnett**  
**in *International Political Science Review***

**Mokken Scaling of EMB Capacity Score**

Mokken Scaling (all 20 Items)

**Scale 1**

| Item                           | Obs. | Mean Score | Observed Guttman errors | Expected Guttman errors | Loevinger H coeff | z-stat. | p-value | Number of NS Hjk |
|--------------------------------|------|------------|-------------------------|-------------------------|-------------------|---------|---------|------------------|
| Election Results               | 99   | 0.8384     | 1                       | 12.12                   | 0.9175            | 7.04    | 0.00    | 0                |
| Election Results Smaller Units | 99   | 0.7576     | 1                       | 12.12                   | 0.9175            | 7.04    | 0.00    | 0                |
| Scale                          | 99   |            | 1                       | 12.12                   | 0.9175            | 7.04    | 0.00    |                  |

**Scale 2**

| Item                               | Obs. | Mean Score | Observed Guttman errors | Expected Guttman errors | Loevinger H coeff | z-stat. | p-value | Number of NS Hjk |
|------------------------------------|------|------------|-------------------------|-------------------------|-------------------|---------|---------|------------------|
| Contact Specific Names/Departments | 99   | 0.60       | 19                      | 43.73                   | 0.56              | 6.83    | 0.00    | 0                |
| Hierarchy                          | 99   | 0.70       | 17                      | 39.59                   | 0.57              | 6.51    | 0.00    | 0                |
| EMB member(s) name                 | 99   | 0.89       | 4                       | 18.28                   | 0.78              | 5.68    | 0.00    | 0                |
| EMB member(s) qualifications       | 99   | 0.51       | 16                      | 40.18                   | 0.60              | 6.60    | 0.00    | 0                |
| Scale                              | 99   |            | 28                      | 70.89                   | 0.60              | 9.06    | 0.00    | 0                |

**Scale 3**

| Item                           | Obs. | Mean Score | Observed Guttman errors | Expected Guttman errors | Loevinger H coeff | z-stat. | p-value | Number of NS Hjk |
|--------------------------------|------|------------|-------------------------|-------------------------|-------------------|---------|---------|------------------|
| Disabled Voters                | 99   | 0.58       | 40                      | 78.61                   | 0.49              | 8.26    | 0.00    | 0                |
| Foreign Voters                 | 99   | 0.61       | 39                      | 78.73                   | 0.50              | 8.58    | 0.00    | 0                |
| Voter Identification           | 99   | 0.69       | 26                      | 71.94                   | 0.63              | 10.36   | 0.00    | 0                |
| Eligibility to Vote            | 99   | 0.71       | 19                      | 68.44                   | 0.72              | 11.33   | 0.00    | 0                |
| Voter Registration Information | 99   | 0.54       | 40                      | 74.73                   | 0.46              | 7.37    | 0.00    | 0                |
| Scale                          | 99   |            | 82                      | 186.22                  | 0.55              | 14.45   | 0.00    | 0                |

**Scale 4**

| Item              | Obs. | Mean Score | Observed Guttman errors | Expected Guttman errors | Loevinger H coeff | z-stat. | p-value | Number of NS Hjk |
|-------------------|------|------------|-------------------------|-------------------------|-------------------|---------|---------|------------------|
| Contact In Person | 99   | 0.65       | 7                       | 14.44                   | 0.51              | 3.59    | 0.00    | 0                |

|                   |    |      |   |       |      |      |      |   |
|-------------------|----|------|---|-------|------|------|------|---|
| Contact Post      | 99 | 0.82 | 7 | 15.3  | 0.54 | 4.21 | 0.00 | 0 |
| Contact Telephone | 99 | 0.94 | 2 | 7.42  | 0.73 | 4.08 | 0.00 | 0 |
| Scale             | 99 |      | 8 | 18.59 | 0.56 | 4.74 | 0.00 | 0 |

## Scale 5

| Item                           | Obs. | Mean Score | Observed Guttman errors | Expected Guttman errors | Loevinger H coeff | z-stat. | p-value | Number of NS Hjk |
|--------------------------------|------|------------|-------------------------|-------------------------|-------------------|---------|---------|------------------|
| Voter Identification           | 99   | 0.69       | 10                      | 35.88                   | 0.72              | 8.38    | 0.00    | 0                |
| Eligibility to Vote            | 99   | 0.71       | 7                       | 34.79                   | 0.79              | 9.10    | 0.00    | 0                |
| Voter Registration Information | 99   | 0.54       | 7                       | 31.64                   | 0.77              | 7.68    | 0.00    | 0                |
| Scale                          | 99   |            | 12                      | 51.15                   | 0.76              | 10.26   | 0.00    | 0                |

Mean scores were created for:

- Transparency (results): Election Results, Election Results Smaller Units
- Information: Disabled Voters, Foreign Voters, Voter Identification Information, Voter Registration Information
- Transparency (personnel): Contact Specific Names/Departments, Hierarchy, EMB member(s) name, EMB member(s) qualifications
- Communication: In-person, Post, Telephone

The overall capacity scale was determined using Mokken Scaling:

| Item          | Obs. | Mean Score | Observed Guttman errors | Expected Guttman errors | Loevinger H coeff | z-stat. | p-value | Number of NS Hjk |
|---------------|------|------------|-------------------------|-------------------------|-------------------|---------|---------|------------------|
| Information   | 99   | 0.53       | 12                      | 19.70                   | 0.39              | 2.82    | 0.00    | 0                |
| Transparency  | 99   | 0.79       | 15                      | 22.47                   | 0.33              | 3.64    | 0.00    | 0                |
| Communication | 99   | 0.81       | 17                      | 27.02                   | 0.37              | 3.47    | 0.00    | 0                |
| Scale         | 99   |            | 29                      | 54.9                    | 0.36              | 4.03    | 0.00    | 0                |

## EMB Website Content Analysis Scores

| Country     | EMB Studied                                                | EMB Website                                                                                                                                                               | Email Test | (1) Information | (2) Communication | (3) Transparency - Results | (4) Transparency - Personnel | (5) Overall Capacity Score (Sum of 1, 2 & 3) |
|-------------|------------------------------------------------------------|---------------------------------------------------------------------------------------------------------------------------------------------------------------------------|------------|-----------------|-------------------|----------------------------|------------------------------|----------------------------------------------|
| Afghanistan | Independent Election Commission                            | <a href="http://www.iec.org.af/fa/">http://www.iec.org.af/fa/</a>                                                                                                         | Yes        | 0.8             | 1                 | 1                          | 1                            | 2.8                                          |
| Albania     | Central Election Commission                                | <a href="http://www.cec.org.al">www.cec.org.al</a>                                                                                                                        | Yes        | 0.6             | 1                 | 1                          | 1                            | 2.6                                          |
| Algeria     | Ministry of the Interior and Local Authorities             | <a href="http://www.interieur.gov.dz/Dynamics/frmItem.aspx?html=50&amp;s=23&amp;lng=ar">http://www.interieur.gov.dz/Dynamics/frmItem.aspx?html=50&amp;s=23&amp;lng=ar</a> | Yes        | 0.8             | 0.67              | 0.5                        | 0                            | 1.97                                         |
| Angola      | National Election Commission                               | <a href="http://www.cne.ao/">www.cne.ao/</a>                                                                                                                              | Yes        | 0               | 1                 | 0                          | 0.75                         | 1                                            |
| Argentina   | Electoral Chamber                                          | <a href="http://www.electoral.gov.ar/">http://www.electoral.gov.ar/</a>                                                                                                   | No         | 0.4             | 1                 | 1                          | 0.25                         | 2.4                                          |
| Armenia     | Central Election Commission                                | <a href="http://www.elections.am/">www.elections.am/</a>                                                                                                                  | Yes        | 0               | 0.67              | 1                          | 1                            | 1.67                                         |
| Australia   | Australian Electoral Commission                            | <a href="http://www.aec.gov.au">www.aec.gov.au</a>                                                                                                                        | Yes        | 1               | 1                 | 1                          | 0.75                         | 3                                            |
| Austria     | Ministry of Internal Affairs                               | <a href="http://www.bmi.gv.at/wahlen">www.bmi.gv.at/wahlen</a>                                                                                                            | Yes        | 1               | 0.67              | 1                          | 0.75                         | 2.67                                         |
| Azerbaijan  | Central Election Commission                                | <a href="http://www.msk.gov.az/az/">www.msk.gov.az/az/</a>                                                                                                                | Yes        | 0.4             | 0.67              | 0.5                        | 1                            | 1.57                                         |
| Bahrain     | Directorate of Election and Referendums                    | <a href="http://www.vote.bh/Ar/index">www.vote.bh/Ar/index</a>                                                                                                            | Yes        | 0.8             | 1                 | 1                          | 0                            | 2.8                                          |
| Bangladesh  | Election Commission                                        | <a href="http://www.ecs.gov.bd">www.ecs.gov.bd</a>                                                                                                                        | Yes        | 0.4             | 1                 | 0.5                        | 1                            | 1.9                                          |
| Barbados    | Barbados Electoral and Boundary Commission                 | <a href="http://www.electoral.barbados.gov.bb/">www.electoral.barbados.gov.bb/</a>                                                                                        | Yes        | 0.6             | 0.33              | 0                          | 0.25                         | 0.93                                         |
| Belarus     | Central Commission of the Republic of Belarus on Elections | <a href="http://www.rec.gov.by/">www.rec.gov.by/</a>                                                                                                                      | Yes        | 0               | 1                 | 1                          | 0.75                         | 2                                            |
| Belgium     | Ministry of Interior                                       | <a href="http://www.elections.fgov.be/index.php?id=1622&amp;L=2">http://www.elections.fgov.be/index.php?id=1622&amp;L=2</a>                                               | Yes        | 1               | 0.33              | 1                          | 0.25                         | 2.33                                         |

|                               |                                           |                                                                                                                                              |     |     |      |     |      |      |
|-------------------------------|-------------------------------------------|----------------------------------------------------------------------------------------------------------------------------------------------|-----|-----|------|-----|------|------|
| Bhutan                        | Electoral Commission of Bhutan            | <a href="http://www.election-bhutan.org.bt/">www.election-bhutan.org.bt/</a>                                                                 | Yes | 1   | 1    | 1   | 0.75 | 3    |
| Bolivia                       | National Electoral Court                  | <a href="http://www.oep.org.bo/">http://www.oep.org.bo/</a>                                                                                  | Yes | 0   | 1    | 1   | 0    | 2    |
| Bosnia-Herzegovina            | Election Commission                       | <a href="http://www.izbori.ba/Default.aspx?Lang=3">http://www.izbori.ba/Default.aspx?Lang=3</a>                                              | Yes | 0.6 | 0.67 | 1   | 0.75 | 2.27 |
| Botswana                      | Independent Election Commission           | <a href="http://www.iec.gov.bw">www.iec.gov.bw</a>                                                                                           | No  | 1   | 0.67 | 1   | 0.25 | 2.67 |
| Brazil                        | High Electoral Tribunal                   | <a href="http://www.tse.jus.br/">www.tse.jus.br/</a>                                                                                         | No  | 0.4 | 1    | 1   | 1    | 2.4  |
| Bulgaria                      | Central Election Commission               | <a href="http://www.cik.bg/">www.cik.bg/</a>                                                                                                 | Yes | 1   | 1    | 1   | 0.75 | 3    |
| Burkina Faso                  | Independent National Election Commission  | <a href="http://www.ceni.bf/">www.ceni.bf/</a>                                                                                               | Yes | 0.6 | 0.67 | 1   | 0.75 | 2.27 |
| Cambodia                      | National Election Commission              | <a href="http://www.necselect.org.kh/nec_khmer/">www.necselect.org.kh/nec_khmer/</a>                                                         | Yes | 0.6 | 0.67 | 1   | 1    | 2.27 |
| Cameroon                      | Elections Cameroon                        | <a href="http://www.elec.cm/">www.elec.cm/</a>                                                                                               | Yes | 0.6 | 0.33 | 0.5 | 1    | 1.43 |
| Chile                         | Electoral Service                         | <a href="http://www.servel.cl/ss/site/home.html">http://www.servel.cl/ss/site/home.html</a>                                                  | Yes | 0.8 | 1    | 1   | 1    | 2.8  |
| Colombia                      | National Electoral Council                | <a href="http://www.registraduria.gov.co">www.registraduria.gov.co</a>                                                                       | Yes | 1   | 1    | 1   | 1    | 3    |
| Congo, Democratic Republic of | National Election Commission              | <a href="http://www.ceni.gouv.cd/">www.ceni.gouv.cd/</a>                                                                                     | Yes | 0.8 | 0    | 0   | 0.25 | 0.8  |
| Costa Rica                    | Supreme Electoral Tribunal                | <a href="http://www.tse.go.cr">www.tse.go.cr</a>                                                                                             | Yes | 1   | 1    | 1   | 1    | 3    |
| Cyprus                        | Central Electoral Service                 | <a href="http://www.moi.gov.cy/moi/moi.nsf/page16_gr/page16_gr?OpenDocument">www.moi.gov.cy/moi/moi.nsf/page16_gr/page16_gr?OpenDocument</a> | Yes | 1   | 1    | 0.5 | 0    | 2.5  |
| Czech Rep                     | Ministry of the Interior                  | <a href="http://www.mvcr.cz/volby.aspx">www.mvcr.cz/volby.aspx</a>                                                                           | Yes | 0.8 | 1    | 1   | 0.75 | 2.8  |
| Djibouti                      | National Independent Electoral Commission | <a href="http://www.ceni.dj/">www.ceni.dj/</a>                                                                                               | Yes | 0   | 0.33 | 0   | 0.5  | 0.33 |
| Ecuador                       | Supreme Electoral Tribunal                | <a href="http://cne.gob.ec/es/">cne.gob.ec/es/</a>                                                                                           | Yes | 0.4 | 1    | 1   | 1    | 2.4  |
| Egypt                         | High Elections Committee                  | <a href="https://www.elections.eg/">https://www.elections.eg/</a>                                                                            | Yes | 0.8 | 0.33 | 1   | 0.25 | 2.13 |
| El Salvador                   | Supreme Election Tribunal                 | <a href="http://www.tse.gob.sv/">www.tse.gob.sv/</a>                                                                                         | No  | 0   | 1    | 1   | 0.5  | 2    |

|               |                                                   |                                                                                                                                          |     |     |      |     |      |      |
|---------------|---------------------------------------------------|------------------------------------------------------------------------------------------------------------------------------------------|-----|-----|------|-----|------|------|
| Fiji          | Elections Fiji                                    | <a href="http://www.electionsfiji.gov.fj/">www.electionsfiji.gov.fj/</a>                                                                 | Yes | 1   | 1    | 1   | 0.5  | 3    |
| Georgia       | Central Election Commission                       | <a href="http://www.cec.gov.ge">www.cec.gov.ge</a>                                                                                       | Yes | 0.8 | 0.67 | 1   | 1    | 2.47 |
| Germany       | Ministry of Interior                              | <a href="http://www.bundeswahlleiter.de">www.bundeswahlleiter.de</a>                                                                     | Yes | 0.8 | 1    | 1   | 0.5  | 2.8  |
| Ghana         | Election Commission of Ghana                      | <a href="http://www.ec.gov.gh/">www.ec.gov.gh/</a>                                                                                       | Yes | 0.2 | 0.67 | 0   | 1    | 0.87 |
| Grenada       | Parliamentary Election Office                     | <a href="http://www.gov.gd/departments/parliamentary_election_office.html">www.gov.gd/departments/parliamentary_election_office.html</a> | Yes | 0   | 1    | 0   | 0.25 | 1    |
| Guinea        | National Election Commission                      | <a href="http://www.ceniguinee.org/">www.ceniguinee.org/</a>                                                                             | Yes | 0.6 | 0    | 0   | 0.75 | 0.6  |
| Guinea-Bissau | National Election Commission                      | <a href="http://www.cne-guineebissau.org/">www.cne-guineebissau.org/</a>                                                                 | Yes | 0   | 0.67 | 1   | 0.25 | 1.67 |
| Honduras      | Supreme Electoral Tribunal                        | <a href="http://www.tse.hn">www.tse.hn</a>                                                                                               | Yes | 0   | 0.33 | 1   | 1    | 1.33 |
| Hungary       | Ministry of Interior and National Election Office | <a href="http://valasztas.hu/hu/ovi/index.html">http://valasztas.hu/hu/ovi/index.html</a>                                                | Yes | 1   | 1    | 1   | 1    | 3    |
| Iceland       | Election Commission                               | <a href="http://www.landskjoer.is/">www.landskjoer.is/</a>                                                                               | Yes | 0.8 | 1    | 1   | 0.75 | 2.8  |
| India         | Election Commission                               | <a href="http://eci.nic.in/eci/eci.html">eci.nic.in/eci/eci.html</a>                                                                     | Yes | 0.8 | 1    | 1   | 0.75 | 2.8  |
| Indonesia     | General Election Commission                       | <a href="http://www.kpu.go.id">www.kpu.go.id</a>                                                                                         | Yes | 0.6 | 1    | 1   | 1    | 2.6  |
| Iran          | Ministry of Interior                              | <a href="http://www.shoragc.ir/Portal/Home/">http://www.shoragc.ir/Portal/Home/</a>                                                      | Yes | 0.4 | 0.67 | 0   | 0.5  | 1.07 |
| Iraq          | High Election Commission                          | <a href="http://www.ihec.iq/ar/">http://www.ihec.iq/ar/</a>                                                                              | Yes | 0.8 | 0.67 | 1   | 1    | 2.47 |
| Israel        | Central Elections Committee                       | <a href="http://www.knesset.gov.il/elections17/heb/cec/CecIndex.asp">www.knesset.gov.il/elections17/heb/cec/CecIndex.asp</a>             | Yes | 0.8 | 0.33 | 0.5 | 0.25 | 1.63 |
| Italy         | Ministry of Interior                              | <a href="http://www.interno.gov.it/it">www.interno.gov.it/it</a>                                                                         | Yes | 0.8 | 0.67 | 1   | 0.75 | 2.47 |
| Japan         | Ministry of Internal Affairs                      | <a href="http://www.soumu.go.jp/">www.soumu.go.jp/</a>                                                                                   | Yes | 1   | 1    | 1   | 0.5  | 3    |
| Jordan        | Independent Election Commission                   | <a href="http://www.entikhabat.jo/public/DefaultAr.aspx">www.entikhabat.jo/public/DefaultAr.aspx</a>                                     | Yes | 0.8 | 1    | 1   | 0.75 | 2.8  |
| Kenya         | Independent Boundaries and Election Commission    | <a href="http://www.iebc.or.ke/">www.iebc.or.ke/</a>                                                                                     | Yes | 0.8 | 1    | 1   | 1    | 2.8  |

|                 |                                          |                                                                                                                    |     |     |      |     |      |      |
|-----------------|------------------------------------------|--------------------------------------------------------------------------------------------------------------------|-----|-----|------|-----|------|------|
| Korea, Republic | National Election Commission             | <a href="http://www.nec.go.kr/portal/main.do">www.nec.go.kr/portal/main.do</a>                                     | Yes | 1   | 1    | 1   | 1    | 3    |
| Kuwait          | Election Commission                      | <a href="http://eservices1.moi.gov.kw/elections/mainmenu.nsf">eservices1.moi.gov.kw/elections/mainmenu.nsf</a>     | No  | 0   | 0    | 1   | 0    | 1    |
| Latvia          | Central Election Commission              | <a href="http://www.cvk.lv/pub/public/index.html">www.cvk.lv/pub/public/index.html</a>                             | Yes | 0.8 | 1    | 1   | 1    | 2.8  |
| Lithuania       | Central Elections Committee              | <a href="http://www.vrk.lt">www.vrk.lt</a>                                                                         | Yes | 0.4 | 0.67 | 1   | 0.75 | 2.07 |
| Macedonia       | State Election Commission                | <a href="http://www.sec.mk/index.php?lang=mk">www.sec.mk/index.php?lang=mk</a>                                     | Yes | 0.2 | 1    | 1   | 0.75 | 2.2  |
| Madagascar      | National Election Commission             | <a href="http://www.ceni-madagascar.mg/">www.ceni-madagascar.mg/</a>                                               | Yes | 0   | 0.33 | 0.5 | 0.5  | 0.83 |
| Malawi          | Electoral Commission                     | <a href="http://www.mec.org.mw/">www.mec.org.mw/</a>                                                               | Yes | 0   | 1    | 1   | 1    | 2    |
| Malaysia        | Election Commission                      | <a href="http://www.spr.gov.my/">www.spr.gov.my/</a>                                                               | Yes | 1   | 1    | 0   | 1    | 2    |
| Maldives        | Elections Commission                     | <a href="http://www.elections.gov.mv/index-2.html">http://www.elections.gov.mv/index-2.html</a>                    | Yes | 0   | 0.67 | 0.5 | 0.25 | 1.17 |
| Malta           | Electoral Commission                     | <a href="http://www.electoral.gov.mt">http://www.electoral.gov.mt</a>                                              | Yes | 1   | 1    | 1   | 0.75 | 3    |
| Mauritania      | National Independent Election Commission | <a href="http://www.ceni.mr/">www.ceni.mr/</a>                                                                     | Yes | 0.2 | 1    | 1   | 0.5  | 2.2  |
| Mauritius       | Office of the Election Commissioner      | <a href="http://electoral.govmu.org/English/Pages/default.aspx">electoral.govmu.org/English/Pages/default.aspx</a> | Yes | 0.8 | 1    | 1   | 0.75 | 2.8  |
| Mexico          | Federal Election Institute               | <a href="http://www.ine.mx/portal/">www.ine.mx/portal/</a>                                                         | Yes | 1   | 1    | 1   | 1    | 3    |
| Micronesia      | Office of President                      | <a href="http://www.fsmpio.fm/">http://www.fsmpio.fm/</a>                                                          | No  | 0   | 0.67 | 1   | 0.25 | 1.67 |
| Moldova         | Central Election Commission              | <a href="http://www.cec.md/index.php?l=ro">http://www.cec.md/index.php?l=ro</a>                                    | Yes | 0.8 | 1    | 1   | 1    | 2.8  |
| Mongolia        | General Election Commission              | <a href="http://www.gec.gov.mn/">www.gec.gov.mn/</a>                                                               | Yes | 1   | 1    | 1   | 1    | 3    |
| Montenegro      | Republic Electoral Commission            | <a href="http://www.dik.co.me/">http://www.dik.co.me/</a>                                                          | Yes | 0   | 0.67 | 0   | 0.5  | 0.67 |
| Namibia         | Election Commission of Namibia           | <a href="http://www.ecn.na/">www.ecn.na/</a>                                                                       | Yes | 0.6 | 1    | 1   | 1    | 2.6  |
| Nepal           | Nepal Election Commission                | <a href="http://www.election.gov.np/election/np">www.election.gov.np/election/np</a>                               | Yes | 0.6 | 0.67 | 1   | 1    | 2.27 |
| Netherlands     | Electoral Council                        | <a href="http://www.kiesraad.nl">www.kiesraad.nl</a>                                                               | No  | 1   | 1    | 1   | 0.75 | 3    |

|                 |                                                           |                                                                                                                                                                                   |     |     |      |     |      |      |
|-----------------|-----------------------------------------------------------|-----------------------------------------------------------------------------------------------------------------------------------------------------------------------------------|-----|-----|------|-----|------|------|
| New Zealand     | Elections New Zealand                                     | <a href="http://www.elections.org.nz/">www.elections.org.nz/</a>                                                                                                                  | Yes | 1   | 0.67 | 1   | 1    | 2.67 |
| Norway          | Ministry of Local Government and Regional Development     | <a href="https://www.regjering.no/nb/tema/valg-og-demokrati/valgportalen-valg-no/id456491/">https://www.regjering.no/nb/tema/valg-og-demokrati/valgportalen-valg-no/id456491/</a> | Yes | 1   | 1    | 1   | 1    | 3    |
| Pakistan        | Election Commission                                       | <a href="http://www.ecp.gov.pk">www.ecp.gov.pk</a>                                                                                                                                | No  | 0.6 | 1    | 1   | 0.75 | 2.6  |
| Panama          | Panama Electoral Tribunal                                 | <a href="http://www.tribunal-electoral.gob.pa">www.tribunal-electoral.gob.pa</a>                                                                                                  | Yes | 0.6 | 0.67 | 1   | 1    | 2.27 |
| Paraguay        | High Tribunal of Electoral Justice                        | <a href="http://www.tsje.gov.py">www.tsje.gov.py</a>                                                                                                                              | Yes | 1   | 1    | 1   | 1    | 3    |
| Philippines     | Commission on Elections                                   | <a href="http://www.comelec.gov.ph">www.comelec.gov.ph</a>                                                                                                                        | Yes | 0.8 | 1    | 1   | 1    | 2.8  |
| Romania         | Permanent Electoral Authority and Central Election Bureau | <a href="http://www.roaep.ro">www.roaep.ro</a>                                                                                                                                    | Yes | 1   | 0.67 | 1   | 1    | 2.67 |
| Rwanda          | National Election Commission                              | <a href="http://www.comelena.gov.rw/home/">www.comelena.gov.rw/home/</a>                                                                                                          | Yes | 1   | 0.33 | 0   | 0.75 | 1.33 |
| Serbia          | Republic Election Commission                              | <a href="http://www.rik.parlament.gov.rs/index_1.htm">http://www.rik.parlament.gov.rs/index_1.htm</a>                                                                             | Yes | 0   | 1    | 1   | 0.75 | 2    |
| Sierra Leone    | National Election Commission                              | <a href="http://www.nec-sierraleone.org/">www.nec-sierraleone.org/</a>                                                                                                            | Yes | 0.6 | 0.33 | 1   | 0.5  | 1.93 |
| Slovakia        | Ministry of Interior                                      | <a href="http://www.civil.gov.sk">www.civil.gov.sk</a>                                                                                                                            | Yes | 1   | 1    | 1   | 0.5  | 3    |
| Slovenia        | Republic Election Commission                              | <a href="http://www.dvk-rs.si/index.php/si">http://www.dvk-rs.si/index.php/si</a>                                                                                                 | Yes | 1   | 1    | 0.5 | 0.75 | 2.5  |
| Solomon Islands | Election Commission                                       | <a href="http://www.siec.gov.sb/">www.siec.gov.sb/</a>                                                                                                                            | Yes | 0.8 | 1    | 0.5 | 0    | 2.3  |
| South Africa    | Independent Electoral Commission                          | <a href="http://www.elections.org.za">www.elections.org.za</a>                                                                                                                    | Yes | 1   | 1    | 1   | 1    | 3    |
| Swaziland       | Elections and Boundaries Commission                       | <a href="http://www.gov.sz/index.php?option=com_content&amp;id=366&amp;Itemid=343">www.gov.sz/index.php?option=com_content&amp;id=366&amp;Itemid=343</a>                          | Yes | 0.6 | 1    | 0   | 0.25 | 1.6  |
| Sweden          | Electoral Authority                                       | <a href="http://www.val.se/">www.val.se/</a>                                                                                                                                      | Yes | 1   | 1    | 1   | 0    | 3    |
| Tajikistan      | Central Commission for Elections and Referenda            | <a href="http://www.kmir.tj/tj/konunguzori.html">http://www.kmir.tj/tj/konunguzori.html</a>                                                                                       | Yes | 0   | 1    | 0   | 0.5  | 1    |
| Thailand        | Electoral Commission                                      | <a href="http://www.ect.go.th/">www.ect.go.th/</a>                                                                                                                                | Yes | 1   | 1    | 1   | 0.25 | 3    |

|               |                                 |                                                                                |     |     |      |   |     |      |
|---------------|---------------------------------|--------------------------------------------------------------------------------|-----|-----|------|---|-----|------|
| Togo          | National Election Commission    | <a href="http://www.ceni-tg.org/">www.ceni-tg.org/</a>                         | Yes | 0.6 | 0.67 | 1 | 0.5 | 2.27 |
| Tonga         | Electoral Commission            | <a href="http://www.tongaelections.com/">www.tongaelections.com/</a>           | Yes | 0.6 | 1    | 0 | 0.5 | 1.6  |
| Tunisia       | Independent Election Commission | <a href="http://www.isie.tn/">www.isie.tn/</a>                                 | Yes | 1   | 1    | 1 | 0.5 | 3    |
| Turkey        | Supreme Electoral Council       | <a href="http://www.ysk.gov.tr">http://www.ysk.gov.tr</a>                      | Yes | 0.6 | 0.67 | 1 | 0.5 | 2.27 |
| Ukraine       | Central Election Commission     | <a href="http://www.cvk.gov.ua">www.cvk.gov.ua</a>                             | Yes | 0.8 | 0.67 | 1 | 1   | 2.47 |
| United States | Federal Electoral Commission    | <a href="http://www.fec.gov">www.fec.gov</a>                                   | Yes | 1   | 0.67 | 0 | 1   | 1.67 |
| Uruguay       | Electoral Court                 | <a href="http://www.corteelectoral.gub.uy/">www.corteelectoral.gub.uy/</a>     | No  | 0.6 | 1    | 1 | 0.5 | 2.6  |
| Venezuela     | National Electoral Court        | <a href="http://www.cne.gov.ve/web/index.php">www.cne.gov.ve/web/index.php</a> | Yes | 0   | 1    | 1 | 0.5 | 2    |
| Zimbabwe      | Election Commission             | <a href="http://www.zec.gov.zw/">www.zec.gov.zw/</a>                           | Yes | 0.8 | 0.67 | 1 | 1   | 2.47 |

All countries above had elections between mid-2012 and 2014 (when coding took place).

One major EMB per country was chosen for coding, based on the Electoral Management Design Handbook (2014 edition). Some website links, however, had changed.



## Data and Variables

| Variable                        | Coding                                                                                                                                                                                                                                                                                                                                                                                                                                                                                                                                                                                                                                                                                                                                                                                                                                                                                                                                                                | Source                                                   |
|---------------------------------|-----------------------------------------------------------------------------------------------------------------------------------------------------------------------------------------------------------------------------------------------------------------------------------------------------------------------------------------------------------------------------------------------------------------------------------------------------------------------------------------------------------------------------------------------------------------------------------------------------------------------------------------------------------------------------------------------------------------------------------------------------------------------------------------------------------------------------------------------------------------------------------------------------------------------------------------------------------------------|----------------------------------------------------------|
| <i>Measures of EMB Capacity</i> |                                                                                                                                                                                                                                                                                                                                                                                                                                                                                                                                                                                                                                                                                                                                                                                                                                                                                                                                                                       |                                                          |
| EMB Budgets                     | Could you provide us with an estimate of your organization's overall budget last national election year (in the currency of your country?)                                                                                                                                                                                                                                                                                                                                                                                                                                                                                                                                                                                                                                                                                                                                                                                                                            | Electoral Management Survey / ELECT Survey               |
| EMB Staff                       | What is the total number of <i>permanent</i> staff of your organisation, including support and administrative staff? If you don't know the correct number please provide the closest estimation.                                                                                                                                                                                                                                                                                                                                                                                                                                                                                                                                                                                                                                                                                                                                                                      | Electoral Management Survey / ELECT Survey               |
| EMB Foreign Assistance          | Does your organization receive assistance from international organizations or governments?<br>Finance Assistance<br>Donated supplies and equipment<br>Training for personnel<br>Assistance in the form of advice and consultation<br>'On the ground' logistical and personnel support<br>Legal support<br>Technical/computing assistance<br>Other, namely: [text]<br>Options:<br>1. On a regular basis<br>2. Often<br>3. Occasionally<br>4. Rarely<br>5. Never<br>6. N/A                                                                                                                                                                                                                                                                                                                                                                                                                                                                                              | Electoral Management Survey / ELECT Survey               |
| VDem EMB Capacity               | Does the Election Management Body (EMB) have sufficient staff and resources to administer a well-run national election?<br>Clarification: The EMB refers to whatever body (or bodies) is charged with administering national elections.<br>0: No. There are glaring deficits in staff, financial, or other resources affecting the organization across the territory.<br>1: Not really. Deficits are not glaring but they nonetheless seriously compromised the organization of administratively well-run elections in many parts of the country.<br>2: Ambiguous. There might be serious deficiencies compromising the organization of the election but it could also be a product of human errors and co-incidence or other factors outside the control of the EMB.<br>3: Mostly. There are partial deficits in resources but these are neither serious nor widespread.<br>4: Yes. The EMB has adequate staff and other resources to administer a well-run election | Varieties of Democracy (Expert survey)                   |
| PEI EMB Performance             | Thinking about the electoral authorities administering elections, in your view... Do you agree or disagree with the following statements... "The election authorities performed well."<br>5-point Likert scale from from "Strongly disagree" to "Strongly agree".                                                                                                                                                                                                                                                                                                                                                                                                                                                                                                                                                                                                                                                                                                     | Perceptions of Electoral Integrity Index (Expert Survey) |

|                                       |                                                                                                                                                                                                                                                                                                                                                                                                                                                                                                                                                                                                                                                                                                                                                                                                                                                                                                                                                                                                                                                                                                                                                                                                                                                                                                                                                                                                                                                                                                                                                                                                                                                                                                                                                                                                  |                                                            |
|---------------------------------------|--------------------------------------------------------------------------------------------------------------------------------------------------------------------------------------------------------------------------------------------------------------------------------------------------------------------------------------------------------------------------------------------------------------------------------------------------------------------------------------------------------------------------------------------------------------------------------------------------------------------------------------------------------------------------------------------------------------------------------------------------------------------------------------------------------------------------------------------------------------------------------------------------------------------------------------------------------------------------------------------------------------------------------------------------------------------------------------------------------------------------------------------------------------------------------------------------------------------------------------------------------------------------------------------------------------------------------------------------------------------------------------------------------------------------------------------------------------------------------------------------------------------------------------------------------------------------------------------------------------------------------------------------------------------------------------------------------------------------------------------------------------------------------------------------|------------------------------------------------------------|
| PEI EMB Sub-Index                     | This is an additive scale conformed by the four EMB variables (“The election authorities were impartial”, “The authorities distributed information to citizens.”, “The authorities allowed public scrutiny of their performance”, “The election authorities performed well.”) and standardized to a 0-100 point scale.                                                                                                                                                                                                                                                                                                                                                                                                                                                                                                                                                                                                                                                                                                                                                                                                                                                                                                                                                                                                                                                                                                                                                                                                                                                                                                                                                                                                                                                                           | Perceptions of Electoral Integrity Index                   |
| <i>Country-Level Variables</i>        |                                                                                                                                                                                                                                                                                                                                                                                                                                                                                                                                                                                                                                                                                                                                                                                                                                                                                                                                                                                                                                                                                                                                                                                                                                                                                                                                                                                                                                                                                                                                                                                                                                                                                                                                                                                                  |                                                            |
| GDP                                   | Gross Domestic Product, per capita, PPP                                                                                                                                                                                                                                                                                                                                                                                                                                                                                                                                                                                                                                                                                                                                                                                                                                                                                                                                                                                                                                                                                                                                                                                                                                                                                                                                                                                                                                                                                                                                                                                                                                                                                                                                                          | World Bank (most recent year available used)               |
| Freedom House Electoral Democracy     | From Freedom House assigns the designation ‘electoral democracy’ to countries that meet minimum standards for political rights (see methodology: <a href="https://freedomhouse.org/report/freedom-world-2015/methodology">https://freedomhouse.org/report/freedom-world-2015/methodology</a> ) This is a dichotomous variable (Non-Electoral Democracy: 0, Electoral Democracy: 1)                                                                                                                                                                                                                                                                                                                                                                                                                                                                                                                                                                                                                                                                                                                                                                                                                                                                                                                                                                                                                                                                                                                                                                                                                                                                                                                                                                                                               | Freedom House (2016 or most recent year available is used) |
| Government Effectiveness              | Quality of public service provision, the quality of the bureaucracy, the competence of civil servants, the independence of the civil service from partisan pressures, and the credibility of the government’s commitment to policies. (-2.5 to 2.5)                                                                                                                                                                                                                                                                                                                                                                                                                                                                                                                                                                                                                                                                                                                                                                                                                                                                                                                                                                                                                                                                                                                                                                                                                                                                                                                                                                                                                                                                                                                                              | World Bank, Acquired from: Quality of Governance Dataset   |
| Internet use                          | Internet users per 100 persons (0-100)<br>No data was available on this dataset for Macedonia, so 2014 data from the World Bank was added.<br><a href="http://data.worldbank.org/indicator/IT.NET.USER.P2">http://data.worldbank.org/indicator/IT.NET.USER.P2</a>                                                                                                                                                                                                                                                                                                                                                                                                                                                                                                                                                                                                                                                                                                                                                                                                                                                                                                                                                                                                                                                                                                                                                                                                                                                                                                                                                                                                                                                                                                                                | World Bank, Acquired from: Quality of Governance Dataset   |
| Regime Durability/Length of Democracy | The number of years since the last regime transition that led to a three point change or greater from previous year.<br>Note: Polity studies only countries with populations of 500000 or more. For the following countries, the length of democracy was estimated using the following sources:<br>Barbados (1966) <a href="http://thecommonwealth.org/our-member-countries/barbados/constitution-politics">http://thecommonwealth.org/our-member-countries/barbados/constitution-politics</a><br>Grenada (1983) <a href="http://news.bbc.co.uk/2/hi/americas/1209649.stm">http://news.bbc.co.uk/2/hi/americas/1209649.stm</a><br>Montenegro (2003) <a href="https://freedomhouse.org/report/freedom-world/2007/montenegro#.Vb_SivlViko">https://freedomhouse.org/report/freedom-world/2007/montenegro#.Vb_SivlViko</a><br>Maldives (2008) <a href="https://freedomhouse.org/report/freedom-world/2010/maldives#.Vb_S0vlViko">https://freedomhouse.org/report/freedom-world/2010/maldives#.Vb_S0vlViko</a><br>Tonga (2010) <a href="https://freedomhouse.org/report/freedom-press/2013/tonga#.Vb_TrviVikp">https://freedomhouse.org/report/freedom-press/2013/tonga#.Vb_TrviVikp</a><br>Micronesia (1979) <a href="https://freedomhouse.org/report/freedom-world/2003/micronesia#.Vb_TVvlViko">https://freedomhouse.org/report/freedom-world/2003/micronesia#.Vb_TVvlViko</a><br>Serbia (2004) <a href="http://www.systemicpeace.org/polity/ser2.htm">http://www.systemicpeace.org/polity/ser2.htm</a><br>Iceland (1944) ( <a href="https://freedomhouse.org/report/freedom-world/2015/iceland">https://freedomhouse.org/report/freedom-world/2015/iceland</a> )<br>Malta (1964) ( <a href="http://www.parlament.mt/historicalbackground?l">http://www.parlament.mt/historicalbackground?l</a> ) | Polity, Acquired from: from PEI_3.0.                       |

#### Datasets:

- Coppedge, Michael, John Gerring, Staffan I. Lindberg, Svend-Erik Skaaning, Jan Teorell, David Altman, Frida Andersson, Michael Bernhard, M. Steven Fish, Adam Glynn, Allen Hicken, Carl Henrik Knutsen, Kelly McMann, Valeriya Mechkova, Farhad Miri, Pamela Paxton, Daniel Pemstein, Rachel Sigman, Jeffrey Staton, and Brigitte Zimmerman. 2016. “V-Dem Codebook v6.” Varieties of Democracy (V-Dem) Project. For more details, see: <https://www.v-dem.net/en/reference/version-6-mar-2016/>
- International IDEA, Global Database on Elections and Democracy, <http://www.idea.int/db/>
- Norris, Pippa; Wynter, Thomas; Grömping, Max, 2017, "Perceptions of Electoral Integrity, (PEI-5.5)", doi:10.7910/DVN/EWYTZ7, Harvard Dataverse, V2, UNF:6:orsycndtUZPrE58BWhCdtg=

- Teorell, Jan, Stefan Dahlberg, Sören Holmberg, Bo Rothstein, Felix Hartmann & Richard Svensson. 2015. The Quality of Government Standard Dataset, version Jan15. University of Gothenburg: The Quality of Government Institute, <http://www.qog.pol.gu.se>
- Freedom House, Freedom in the World Report 2016, <https://freedomhouse.org/report-types/freedom-world>
- World Bank, International Comparison Program database, <https://data.worldbank.org/indicator/NY.GDP.PCAP.PP.CD>
